# Supplementary material for: Impedimetric Determination of Kanamycin in Milk with Aptasensor Based on Carbon Black-Oligolactide Composite
Source: Sensors (Basel). 2020 Aug 21;20(17):4738. doi: 10.3390/s20174738 (PMC7506709; doi:10.3390/s20174738)

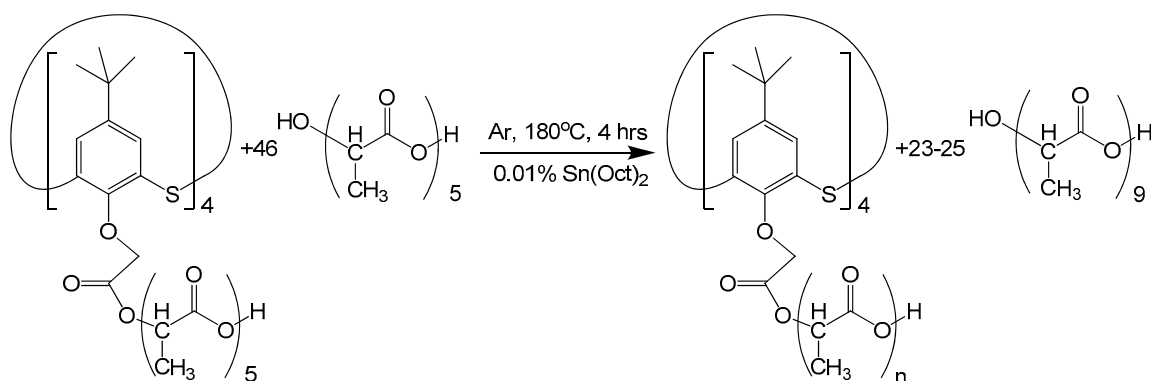

**Scheme S1.** General scheme of the synthesis of thiacalix[4]arene bearing oligolactide fragments (OLA-cone).

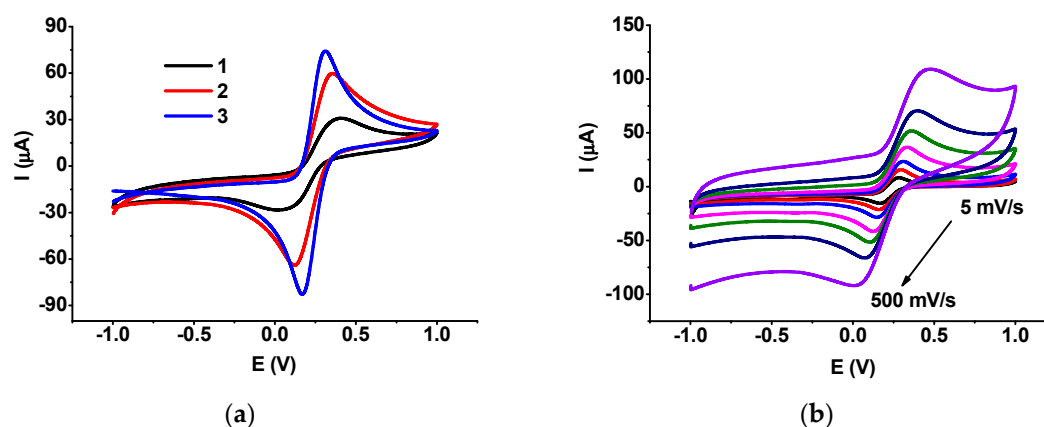

**Figure S1.** Cyclic voltammograms recorded with the glassy carbon electrode (GCE) covered with the carbon black (CB), OLA-cone, and aptamers. Measurements in phosphate buffer (PB), pH = 7.0, in the presence of 0.01 M  $K_3[Fe(CN)_6]$  and 0.01 M  $K_4[Fe(CN)_6]$  at the scan rate of 100 mV/s. (a) 1: CB in chitosan matrix; 2: CB in chitosan matrix mixed with the OLA-cone/aptamer 1:1 mixture; 3: the same aptasensor after 20 min incubation in 1.0 nM KANA; (b) CB in chitosan matrix mixed with the OLA-cone/aptamer 1:2 mixture, depending on the scan rate.

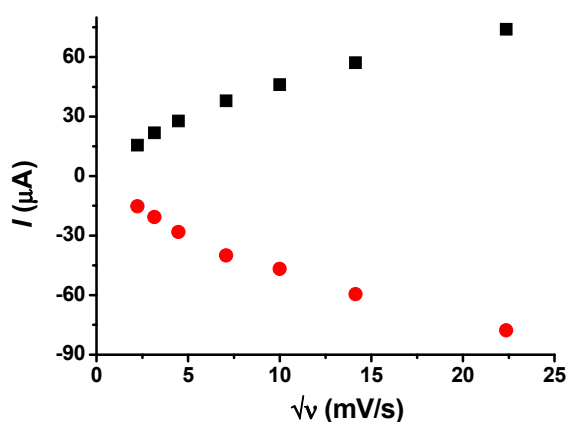

**Figure S2.** The dependence of the cathodic (black squares) and anodic (red circles) peak currents of cyclic voltammograms recorded with the GCE covered with the CB/chitosan and OLA-cone/aptamer (1:2) suspension on the square root from the scan rate, mV/s. Measurements in PB, pH = 7.0, in the presence of 0.01 M  $K_3[Fe(CN)_6]$  and 0.01 M  $K_4[Fe(CN)_6]$ .

**Table S1.** The dependence of the relative increase of the working surface area of the electrode ( $n$ ) calculated from the Randles–Sevcik equation on the pH and concentration of the PB. Deposition of 2  $\mu$ L of 1 mg/mL suspension of the CB in 0.275% chitosan.

| PB Concentration (mM) | pH  | Real Electrode Surface ( $\text{mm}^2$ ) | $n$ |
|-----------------------|-----|------------------------------------------|-----|
| 25                    | 6.0 | 2.50                                     | 1.3 |
| 25                    | 7.0 | 2.54                                     | 1.3 |
| 25                    | 7.4 | 2.53                                     | 1.3 |
| 25                    | 8.0 | 2.55                                     | 1.3 |
| 10                    | 7.0 | 2.53                                     | 1.3 |
| 35                    | 7.0 | 2.54                                     | 1.3 |
| 50                    | 7.0 | 2.56                                     | 1.3 |

**Table S2.** The dependence of the electrochemical impedance spectroscopy (EIS) parameters ( $(R_{et})_1$ ,  $CPE_1$ , and  $n_1$ ) on the period of incubation in 1.0 nM Kanamycin A (KANA) solution. Aptasensor with the CB/chitosan and the OLA-cone/ptamer 1:2 mixture. Electrode–layer interface, average  $\pm$  standard deviation for three measurements with individual aptasensors.  $(R_{et})_1$  is the charge transfer resistance,  $CPE_1$  is the constant phase element and  $n_1$  is exponent in Equation (6) of the main text.

| Incubation Period (min) | $(R_{et})_1$ (k $\Omega$ ) | $CPE_1$ ( $\mu$ F) | $n_1$ |
|-------------------------|----------------------------|--------------------|-------|
| 10                      | $0.52 \pm 0.02$            | $1.50 \pm 0.10$    | 0.95  |
| 20                      | $0.43 \pm 0.03$            | $1.41 \pm 0.22$    | 0.93  |
| 30                      | $0.42 \pm 0.01$            | $1.32 \pm 0.11$    | 0.92  |
| 40                      | $0.41 \pm 0.02$            | $1.44 \pm 0.09$    | 0.93  |

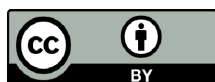

Supplement: Supplementary file 1 [file sensors-20-04738-s001.pdf]
